# Supplementary material for: Arginine/Lysine Residues in the Cytoplasmic Tail Promote ER Export of Plant Glycosylation Enzymes
Source: PubMed Central journal article supplement (PMC3014094; doi:10.1111/j.1600-0854.2008.00841.x), 2008-11-03
Supplement: tra_841_SD1.pdf [file tra_841_SD1.pdf]

| Name        | Sequence                                                                                          |
|-------------|---------------------------------------------------------------------------------------------------|
| Ath-MII-40F | ATCTAGAATGCCACGAAAACGAACTCTCGTAG                                                                  |
| Ath-MII-41F | ATCTAGAATGCCAGCAGCAGCAACTCTCGTAGTC                                                                |
| Ath-MII-42R | AGGATCCGAGAGTGAGGAGGAAGAAGA                                                                       |
| Ath-MII-44R | AGGATCCCCGATTGGATCTGGAGGTAAG                                                                      |
| Ath-MII-48F | ATCTAGAATGCCAGCAAAGCAACTCTCGTAGTC                                                                 |
| Fc-1F       | TATAGGATCCGCACCTGAACTCCTGGGGGGAC                                                                  |
| Fc-1R       | TATAAGATCTTTTACCCGGAGACAGGGAGAGGCTC                                                               |
| GCSI-1      | ATCTAGAATGACCCGGAGCTAGCCGTCCGAGC                                                                  |
| GCSI-2      | TGGTACCCGAGATTCGTCTTGAAAGCACCG                                                                    |
| GCSI-3      | TGGATCCAAAAGGAGTGATAACCCTAGGCTTC                                                                  |
| GCSI-4      | TGGTACCTATTGGTTGGGTTAATCATATTAGGG                                                                 |
| mRFP1       | TATAGTGCACATGGCCTCCTCCGAGGACGTC                                                                   |
| mRFP2       | TATAGGATCCTTAGGCGCCGGTGGAGTGG                                                                     |
| mRFP3       | TATAGGTACCATGGCCTCCTCCGAGGACGTC                                                                   |
| mRFP5-F     | TATAGGATCCGCCTCCTCCGAGGACGTCATCAAG                                                                |
| mRFP6-R     | TATAGTGCACTTATAATTCATCATGGGCGCCGGTGGAGTGCGGCCCTCG                                                 |
| NtC3F       | CTAGATGAGAGGGTACGCGTTTTGCTGTGATTTCCGCTAC                                                          |
| NtC3R       | GCGAAATCACAGCAAACGCGTACCCTCTCAT                                                                   |
| NtC4F       | CTAGATGGCAGGGTACGCGTTTTGCTGTGATTTCCGGTAC                                                          |
| NtC4R       | CGGAAATCACAGCAAACGCGTACCCTGCCAT                                                                   |
| NtC8F       | CTAGATGGCAGGGTACGCGTTTTGCTGTGATTTCCGCTAC                                                          |
| NtC8R       | GCGAAATCACAGCAAACGCGTACCCTGCCAT                                                                   |
| NtGnTI-1    | TATAAAGCTTCTAGATGAGAGGGTACAAGTTTTG                                                                |
| NtGnTI-11F  | CTAGAATGAGAGGGTACAAGTTTTGCTGTGATTTCCGGTACCTCCTCATCTTGGCTGCTGTCGCCTTCATCTACATACAGATGCGGCTTTTTAGTAC |
| NtGnTI-11R  | TAAAAAGCCGCATCTGTATGTAGATGAAGGCGACAGCAGCCAAGATGAGGAGGTACCGGAAATCACAGCAAACCTTGTACCCTCTCATT         |
| NtGnTI-12F  | CTAGAATGTACCTCCTCATCTTGGCTGCTGTCGCCTTCATCTACATACAGATGCGGCTTTTTGGTAC                               |
| NtGnTI-12R  | CAAAAAGCCGCATCTGTATGTAGATGAAGGCGACAGCAGCCAAGATGAGGAGGTACATT                                       |
| NtGnTI-13F  | TATATCTAGAATGAGAGGGTACAAGTTTTG                                                                    |
| NtGnTI-14F  | GTGGTTTTCCGGTATCAAACGTCCAGAC                                                                      |
| NtGnTI-14R  | GTCTGGACGTTTGATACCGGAAAACCAC                                                                      |
| NtGnTI-15R  | TATAGGATCCAGTATCTTCATTTCCGAGTTGTT                                                                 |
| NtGnTI-16R  | TATAGGATCCCTGACGCTTCATTTGTTT                                                                      |
| NtGnTI-2    | TATAGTGCACCTGACGCTTCATTTGTTT                                                                      |
| XT-C1F      | CTAGAATGAGTAAACGGAATCCGAAGATTCTGAAGTAC                                                            |
| XT-C1R      | TTCAGAATCTTCGGATTCCGTTTACTCATT                                                                    |

**Supplementary Table S1**

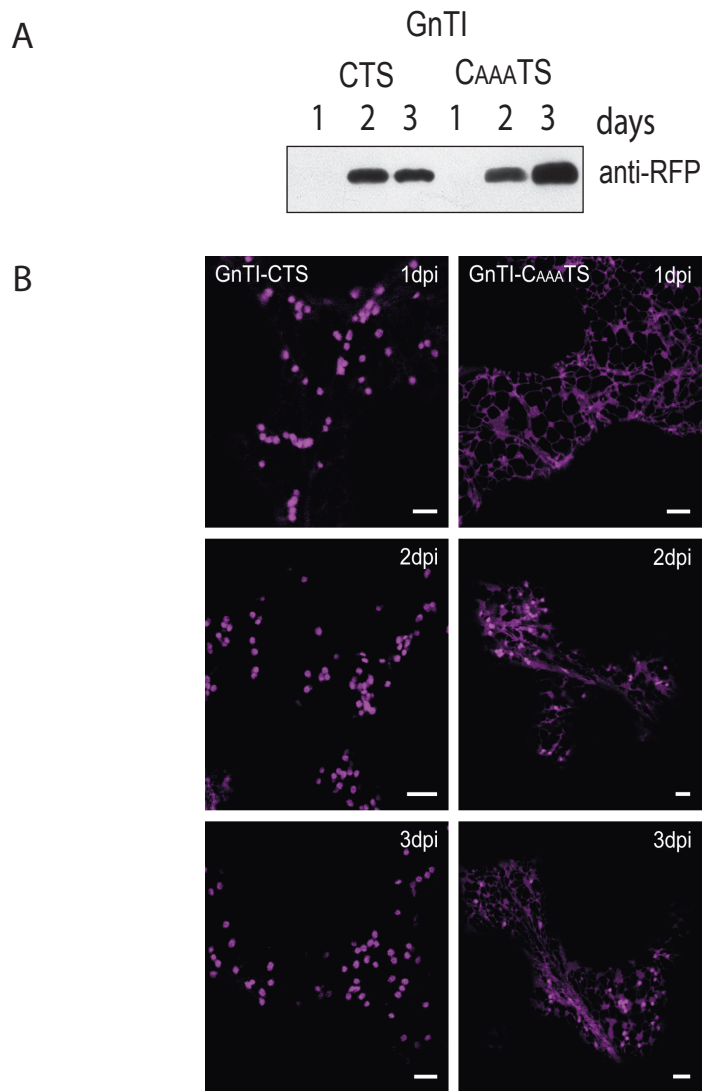

**Supplementary Figure S1. Time-course of *N. benthamiana* leaf epidermal cells expressing wildtype and tail-mutated GnTI chimeras.** (A) Western blot analysis of *N. benthamiana* leaf epidermal cells expressing GnTI-CTS-mRFP and the tail mutated form GnTI-CAAATS-mRFP. Proteins were extracted 1 to 3 days postinfiltration, subjected to SDS-PAGE (12%) and analyzed by immunoblotting using anti-RFP antibodies (B) GnTI-CTS-mRFP and GnTI-CAAATS-mRFP were expressed in *N. benthamiana* leaf epidermal cells and imaged 1 dpi, 2 dpi and 3 dpi. The wildtype GnTI fusion predominantly localized to Golgi stacks throughout the entire time course. The tail-mutated GnTI fusion predominantly marked the ER with a slight increase of Golgi labelling over time. Scale bar = 5  $\mu$ m for all images.

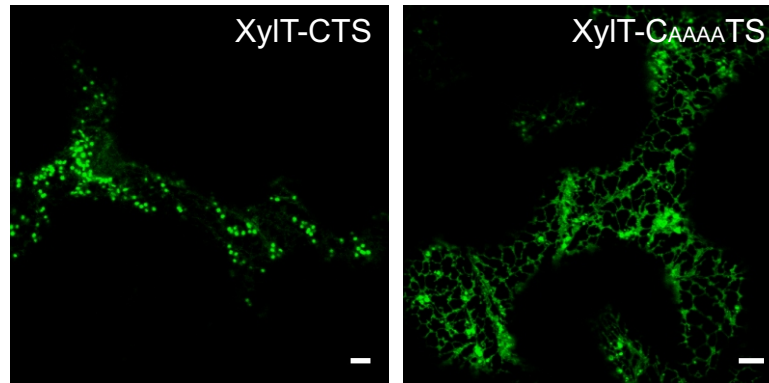

**Supplementary Figure S2. Confocal images of wildtype and tail-mutated XylT-GFP transiently expressed in *N. benthamiana* leaf epidermal cells.** The wildtype XylT-CTS-GFP fusion targets its steady-state location, which is the Golgi apparatus. Note the faint ER staining that occasionally showed up. Similarly to the tail-mutated forms of GnTI and GMII, XylT-C<sub>AAAA</sub>TS-GFP fails to exit from the ER, which points out the importance of basic amino acids in the cytoplasmic tail to ER export and Golgi localization. Scale bar = 5  $\mu$ m for all images.

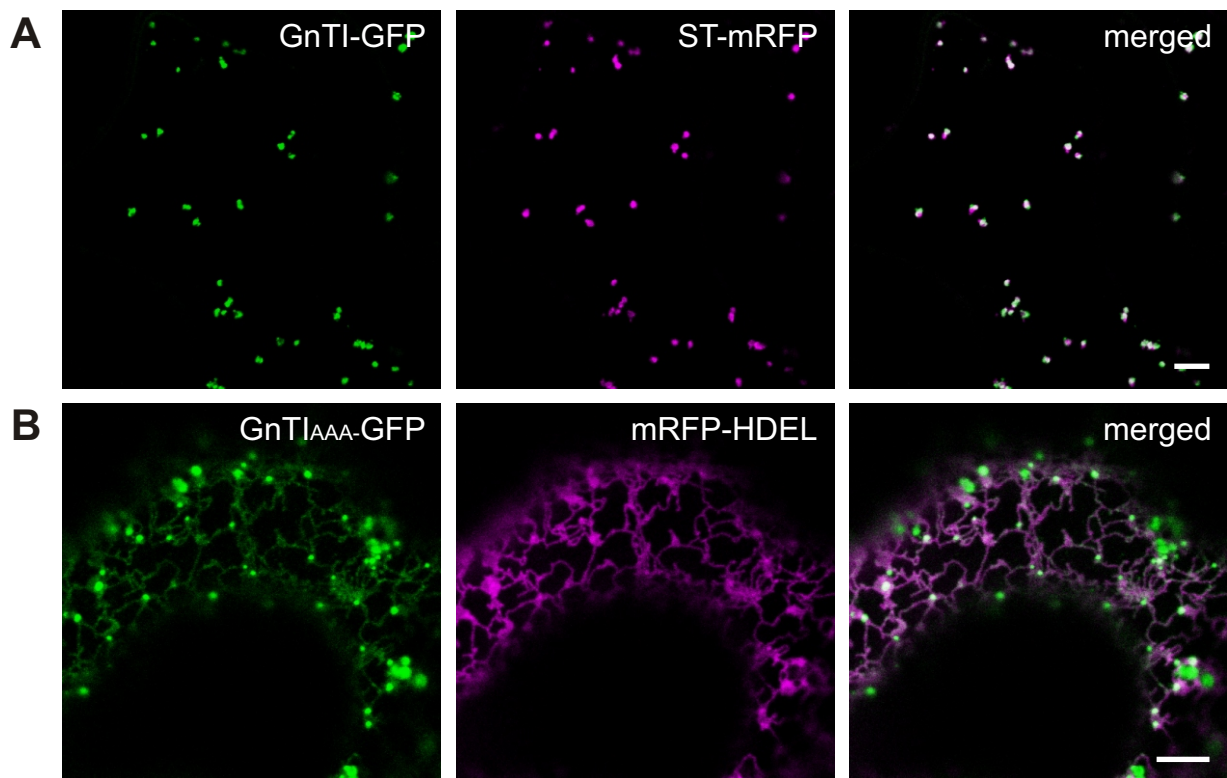

**Supplementary Figure S3. The subcellular localization of wildtype and tail-mutated full-length GnTI fusion proteins is identical to their GnTI-CTS forms.** A) Confocal images of a *N. benthamiana* leaf epidermal cell coexpressing full-length GnTI-GFP with the Golgi marker ST-mRFP. B) Images of full-length GnTI<sub>AAA</sub>-GFP coexpressed with the ER marker mRFP-HDEL. Scale bar = 5  $\mu$ m for all images.

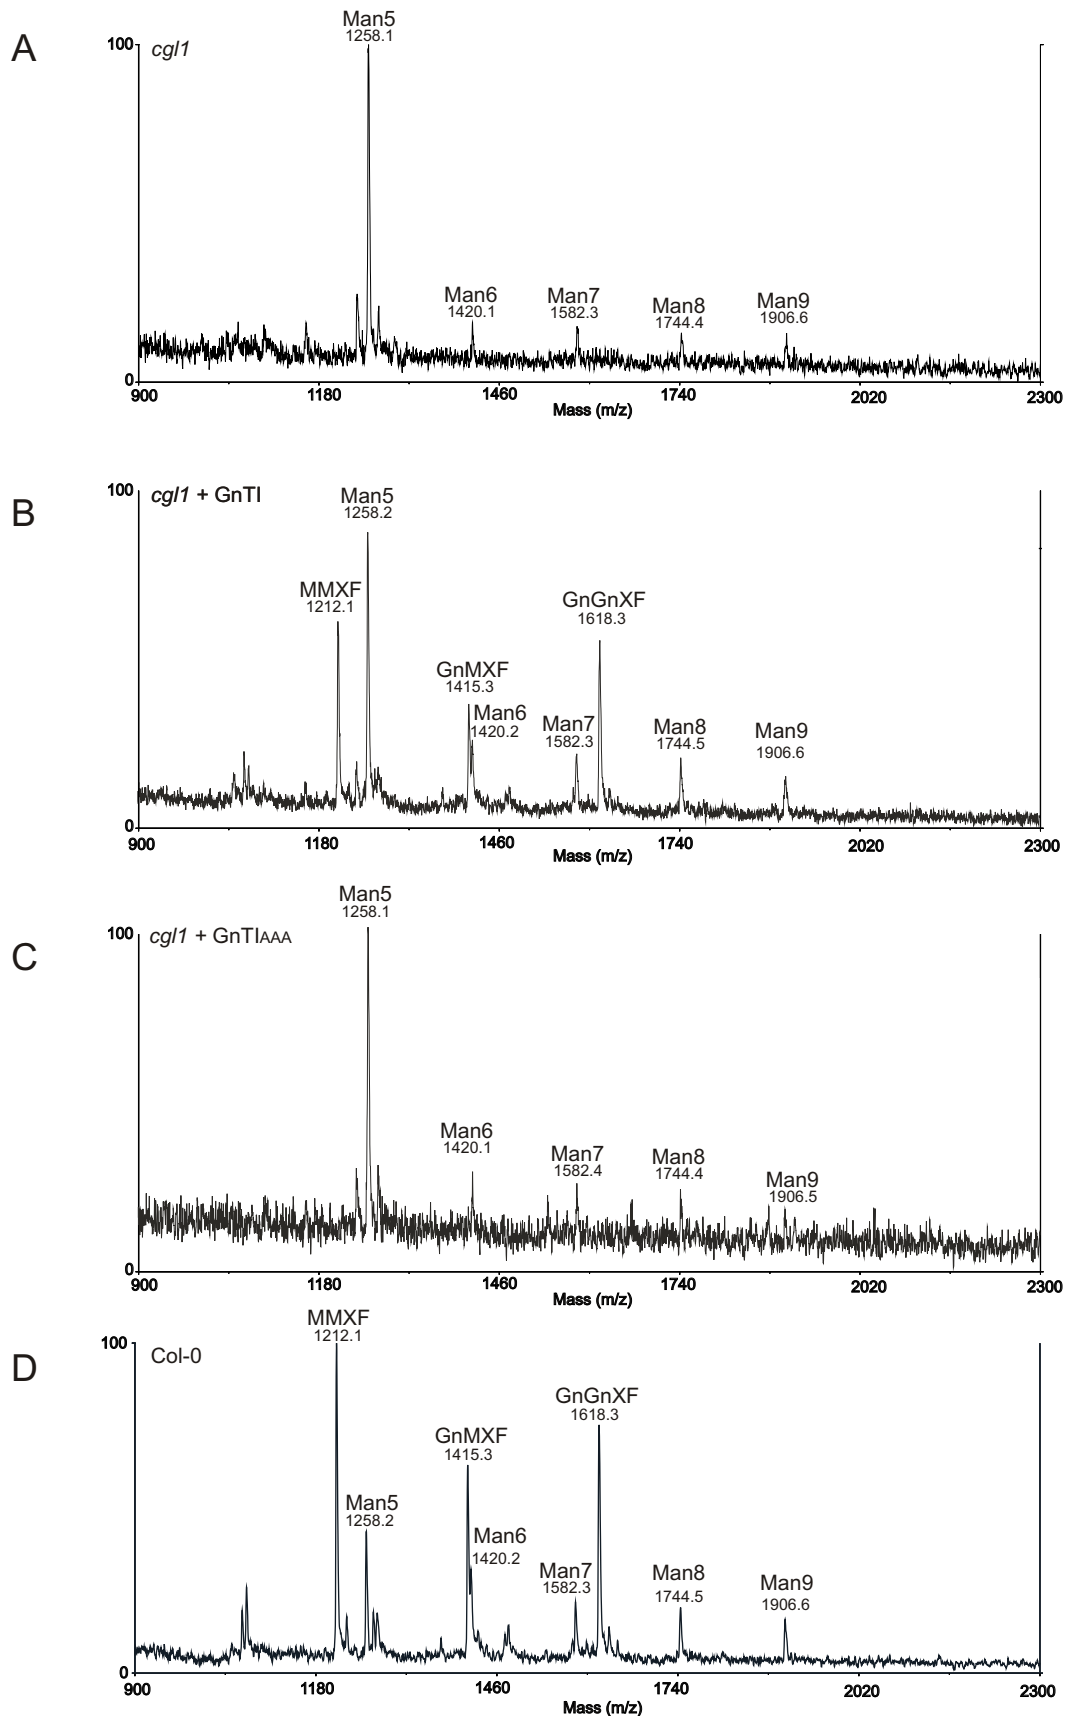

**Supplementary Figure S4: Matrix-assisted laser desorption ionization-time of flight/time of flight mass spectrometry (MALDI-TOF-MS) analyses of total N-glycans extracted from leaves of transformed *cgl1* plants.** Analysis was done as described previously (Strasser et al., 2005). (A) *cgl1*: untransformed control displays oligo-mannosidic N-glycan structures as described previously (von Schaeuwen et al., 1993; Strasser et al., 2005). (B) *cgl1 + GnTI*-GFP (line 6) shows the formation of complex N-glycan structures (MMXF, GnMXF, GnGnXF), but the N-glycan pattern is not completely restored compared to wildtype plants. (C) *cgl1 + GnTIAAA*-GFP (line 8) shows no detectable complex N-glycans, indicating the absence of GnTI in the Golgi apparatus. (D): Col-0: N-glycan structures found in wildtype plants. See <http://www.proglycan.com> for an explanation of N-glycan abbreviations.
